# Supplementary material for: Influence of Glutaraldehyde Cross-Linking Modes on the Recyclability of Immobilized Lipase B from Candida antarctica for Transesterification of Soy Bean Oil
Source: PubMed Central journal article supplement (PMC6225267; doi:10.3390/molecules23092230), 2018-09-02
Supplement: molecules-23-02230-s001.pdf [file molecules-23-02230-s001.pdf]

# Influence of glutaraldehyde cross-linking modes on the recyclability of immobilized lipase B from *Candida antarctica* for the transesterification of soy bean oil

Modenez, I. A.<sup>1</sup>, Sastre, D. E.<sup>2</sup>, Moraes, C. F.<sup>3</sup>, Marques Netto, C.G.C.\*<sup>1</sup>

- 1- Laboratório de Metaloenzimas e Biomiméticos, Departamento de Química, UFSCar, São Carlos-SP, Brazil \*email: [caterina@ufscar.br](mailto:caterina@ufscar.br)
- 2- Departamento de Física e Ciências Interdisciplinares, Instituto de Física, Universidade de São Paulo, São Carlos-SP, Brazil
- 3- Laboratório de Analítica, Bioanalítica, Biossensores, Eletroanalítica e Sensores, Departamento de Química, UFSCar, São Carlos-SP, Brazil

|                                                                                                                                                             |    |
|-------------------------------------------------------------------------------------------------------------------------------------------------------------|----|
| S1. <sup>1</sup> H NMR spectra of ImS4 zwitterionic surfactant.....                                                                                         | 2  |
| S2. <sup>1</sup> H NMR spectra of ImS10 zwitterionic surfactant.....                                                                                        | 3  |
| S3. <sup>1</sup> H NMR spectra of ImS18 zwitterionic surfactant.....                                                                                        | 3  |
| S4. DRX of NP-ImS4. ....                                                                                                                                    | 4  |
| S5. DRX of NP-ImS10. ....                                                                                                                                   | 4  |
| S7. SEM of NP-ImS4.....                                                                                                                                     | 5  |
| S8. SEM of NP-ImS10.....                                                                                                                                    | 6  |
| S9. SEM of NP-ImS18.....                                                                                                                                    | 7  |
| S10. Number of particle size distribution of NP-ImS4 at 1gL <sup>-1</sup> concentration. ....                                                               | 8  |
| S11. Number of particle size distribution of NP-ImS10 at 1gL <sup>-1</sup> concentration .....                                                              | 8  |
| S12. Number of particle size distribution of NP-ImS18 at 1gL <sup>-1</sup> concentration .....                                                              | 9  |
| S13. Number of particle size distribution of NP-ImSn (n=4, 10 and 18) at 10gL <sup>-1</sup> concentration. ....                                             | 10 |
| S16. <sup>1</sup> H NMR spectra of oleyltriacylglyceride.....                                                                                               | 12 |
| S17. FTIR spectra of immobilized CAL-B on NP-ImS18 at pHs 4 (black line), 7 (red line) and 11 (blue line). ....                                             | 12 |
| S18. FTIR spectra of immobilized CAL-B on NP-ImS4 in a system without ImS18 as a contaminant (black line) and with ImS18 as a contaminant (red line) . .... | 13 |

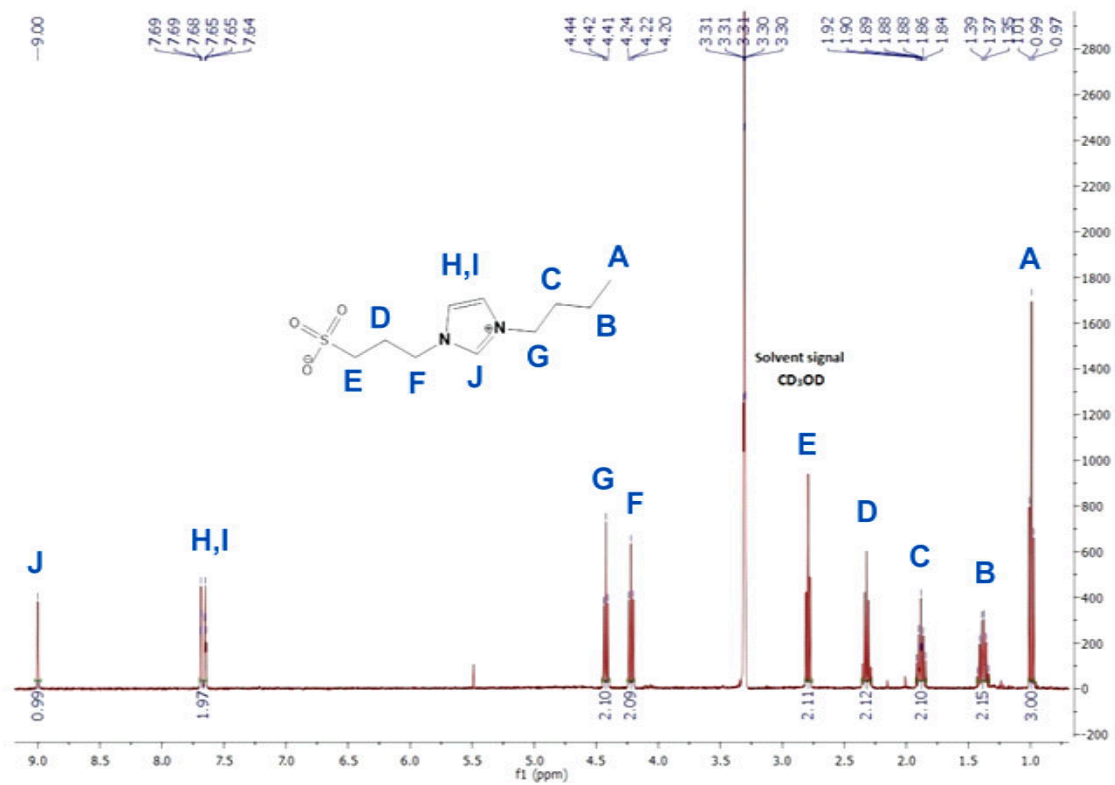

S1. <sup>1</sup>H NMR spectra of ImS4 zwitterionic surfactant.

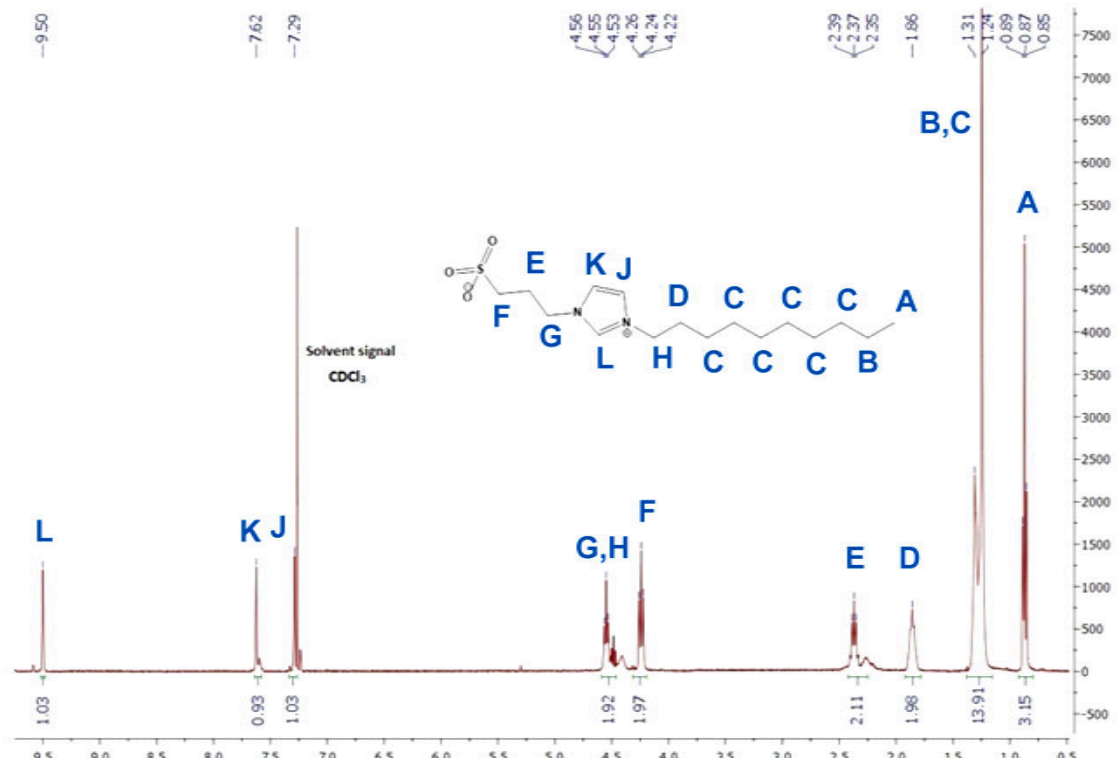

S2. <sup>1</sup>H NMR spectra of ImS10 zwitterionic surfactant.

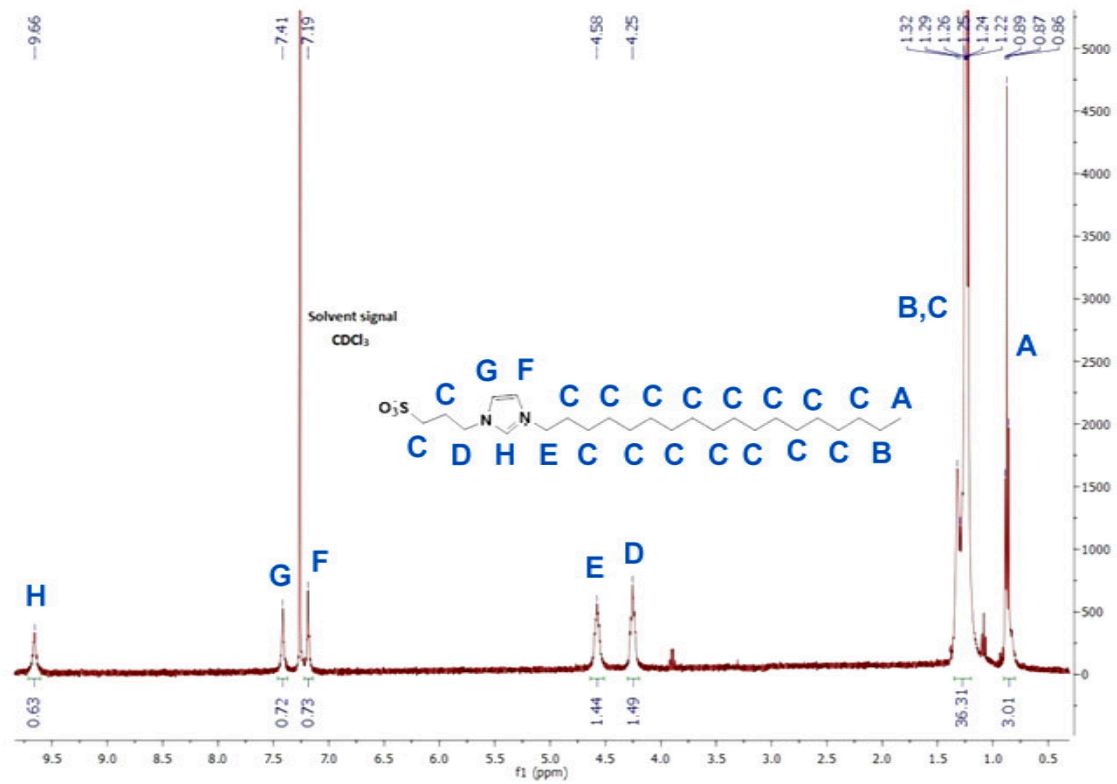

S3. <sup>1</sup>H NMR spectra of ImS18 zwitterionic surfactant.

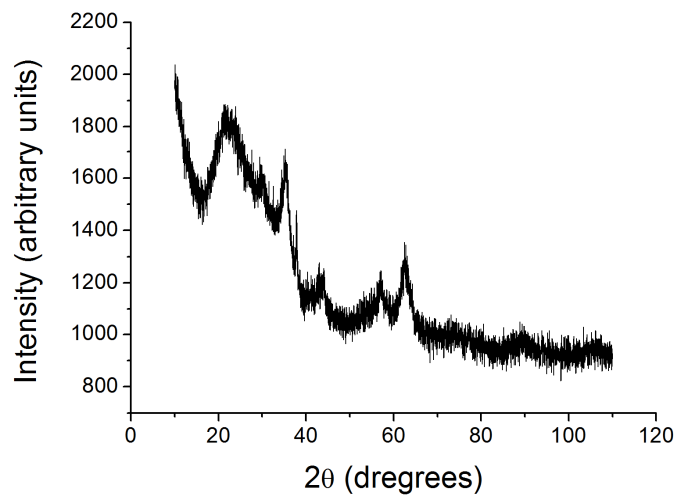

S4. DRX of NP-ImS4.

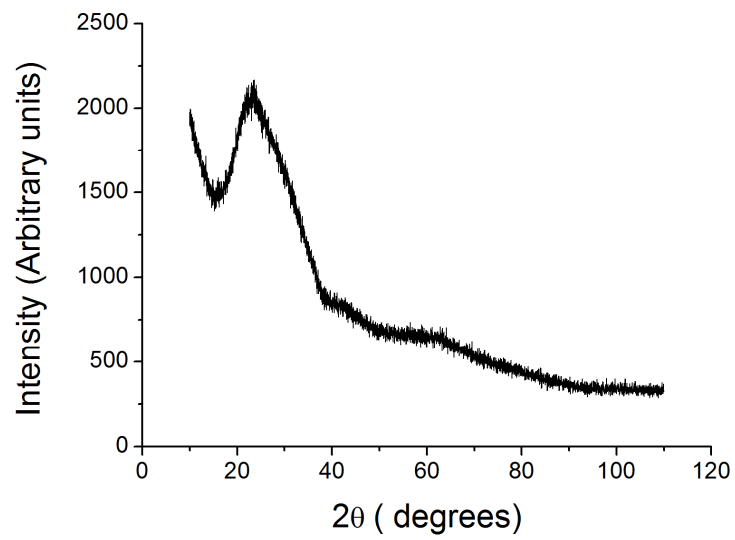

S5. DRX of NP-ImS10.

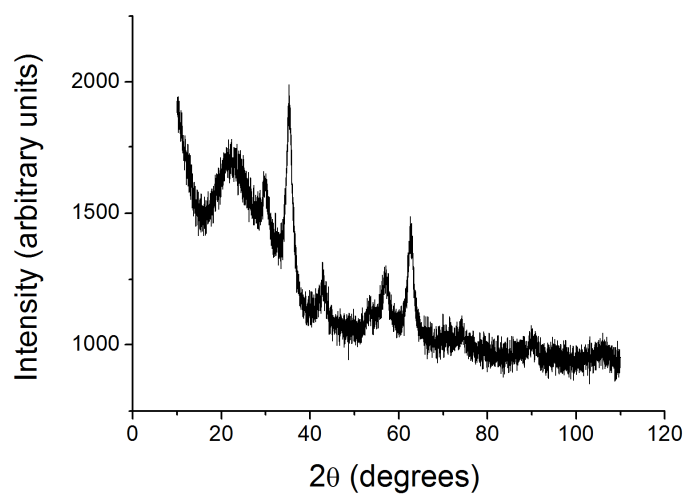

S6. DRX of NP-ImS18.

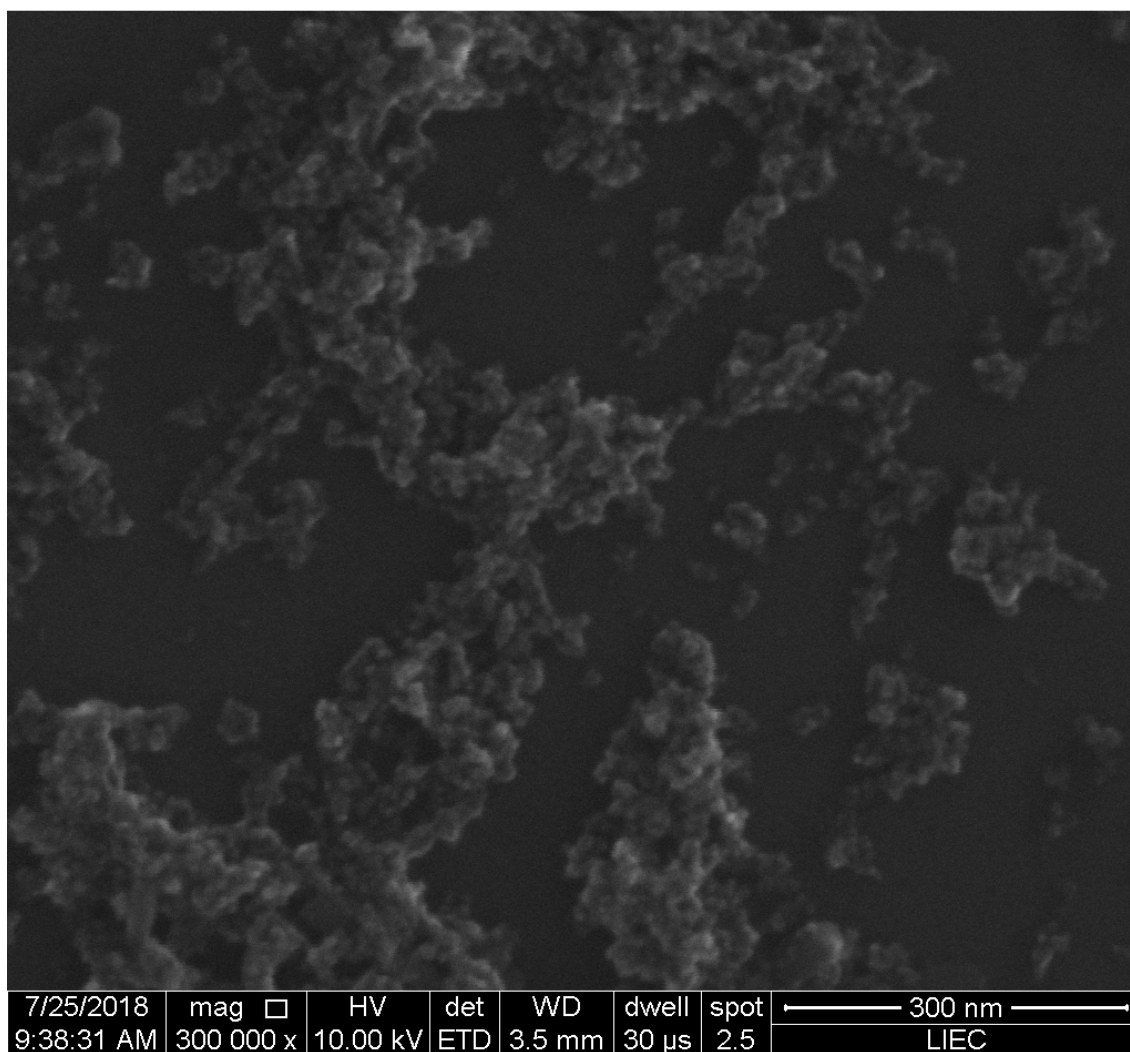

S7. SEM of NP-ImS4.

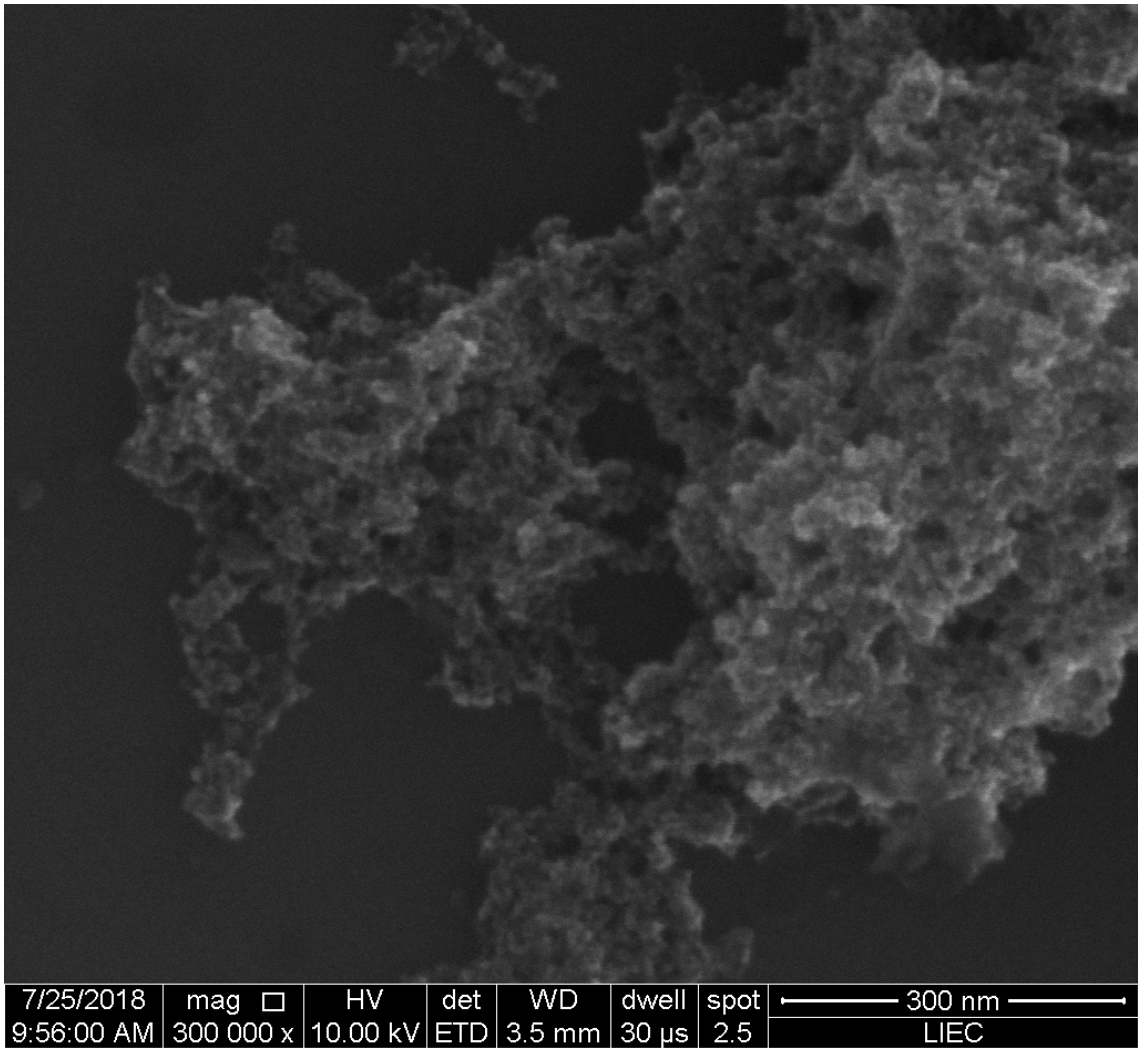

S8. SEM of NP-ImS10.

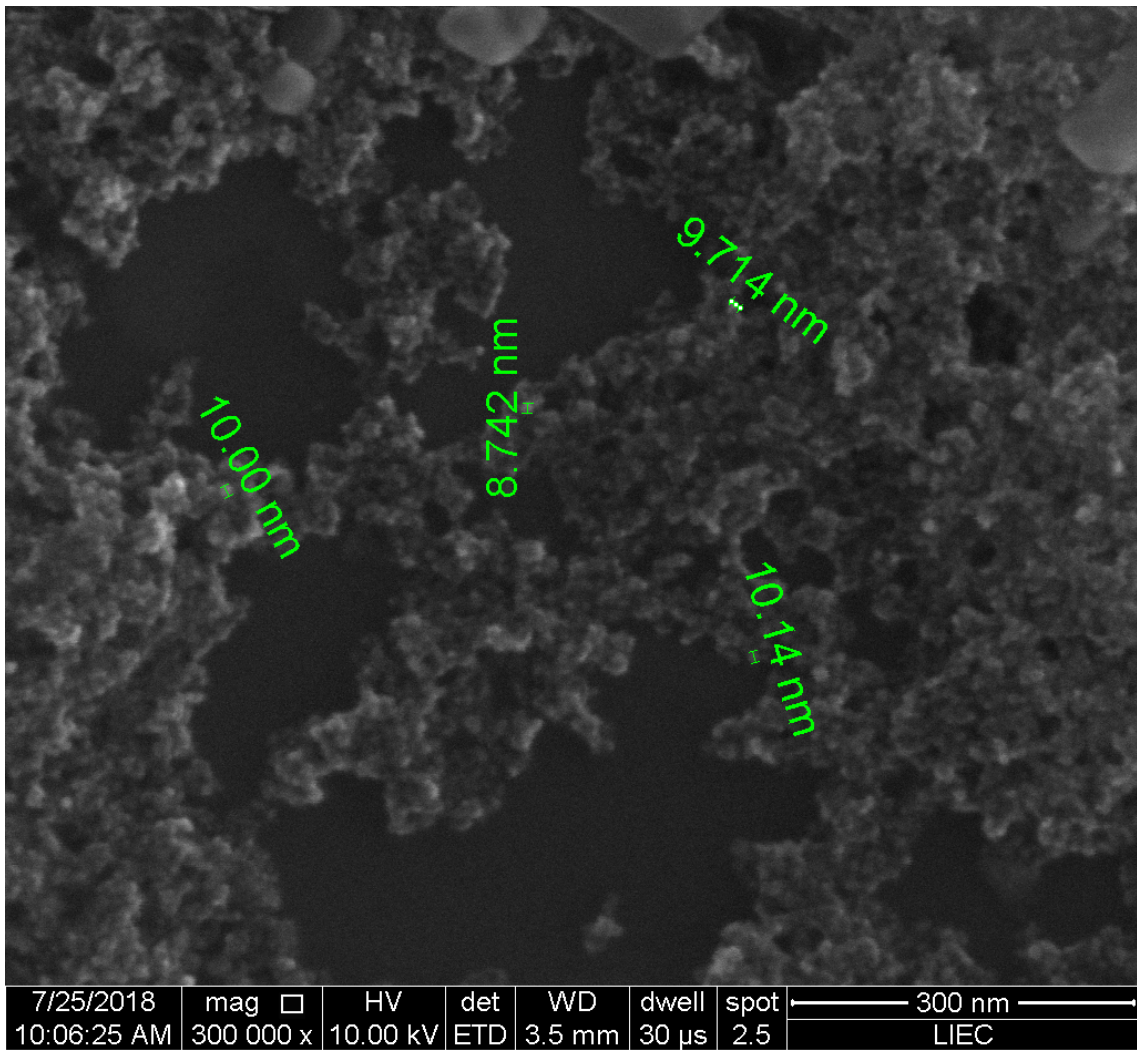

S9. SEM of NP-ImS18.



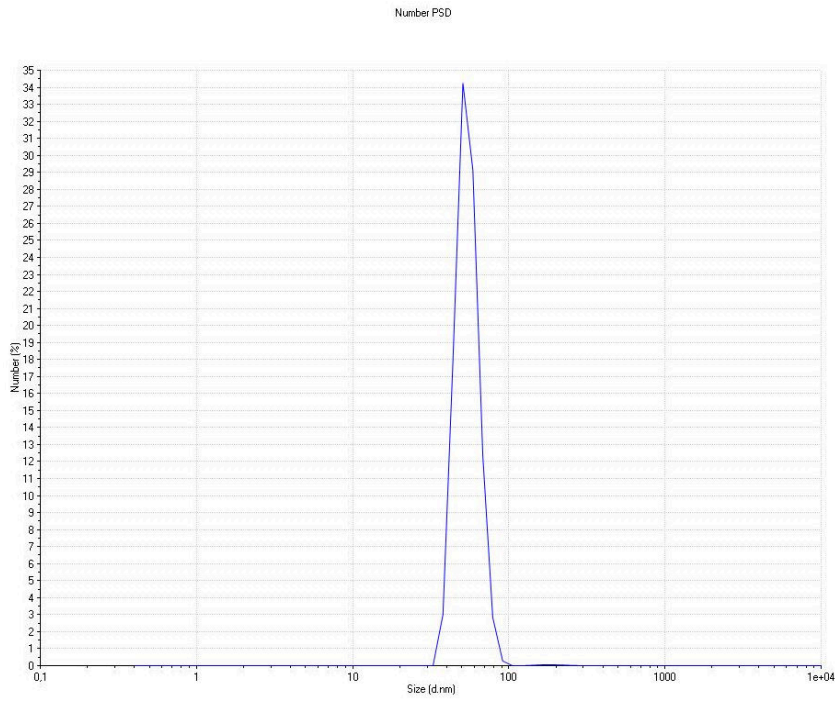

Count Rate: 470,9kcps

**Cumulants result**  
 Z-Average size: 133,8 d.nm

PDI: 0,612  
 PDI width: 104,7 d.nm

**Distribution result**

|         | Mean / Area        |
|---------|--------------------|
| Peak 1: | 131,1 d.nm / 0,2%  |
| Peak 2: | 54,52 d.nm / 99,8% |

S10. Number of particle size distribution of NP-ImS4 at  $1\text{gL}^{-1}$  concentration.

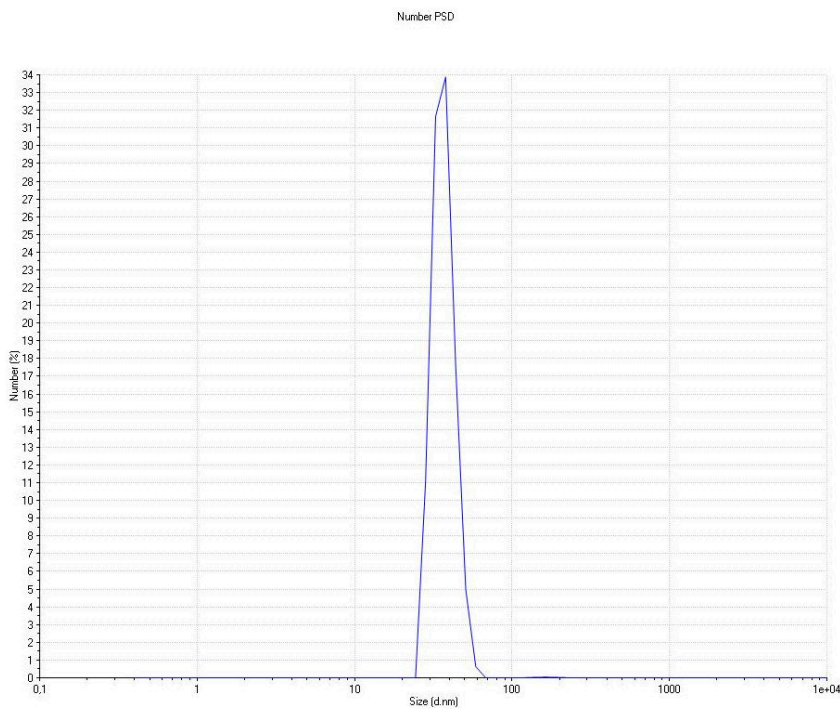

Count Rate: 547,9kcps

**Cumulants result**  
 Z-Average size: 218,1 d.nm

PDI: 0,674  
 PDI width: 179 d.nm

**Distribution result**

|         | Mean / Area        |
|---------|--------------------|
| Peak 1: | 36,37 d.nm / 99,9% |
| Peak 2: | 163,7 d.nm / 0,1%  |

S11. Number of particle size distribution of NP-ImS10 at  $1\text{gL}^{-1}$  concentration



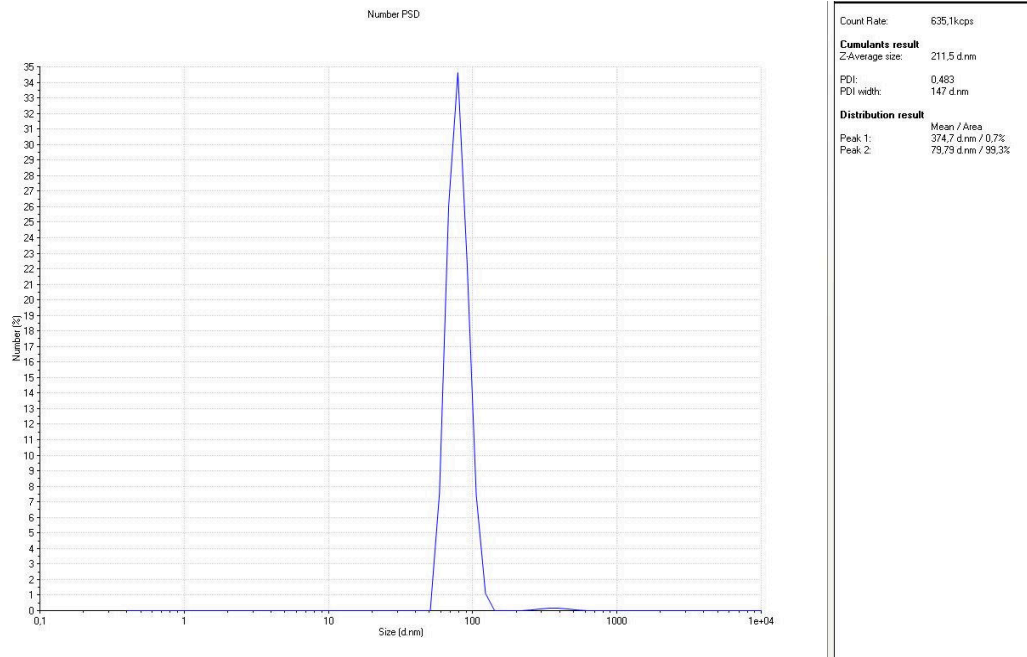

S12. Number of particle size distribution of NP-ImS18 at 1gL<sup>-1</sup> concentration

# NP-ImS4

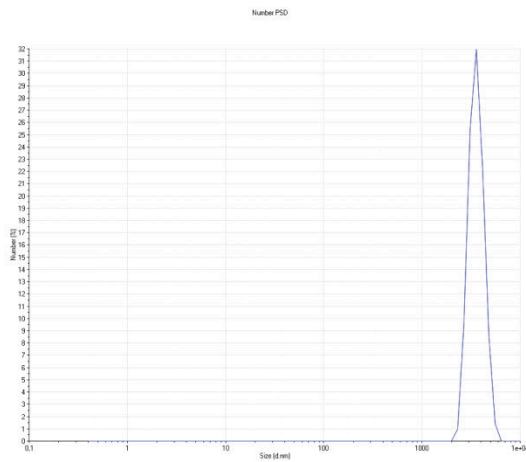

Count Rate: 395.8kpps  
**Cumulative result**  
Z-average size: 4592 d.nm  
PDI: 0.195  
PDI width: 1806 d.nm  
**Distribution result**  
Peak 1: Mean / Area  
3613 d.nm / 100.0%

# NP-ImS10

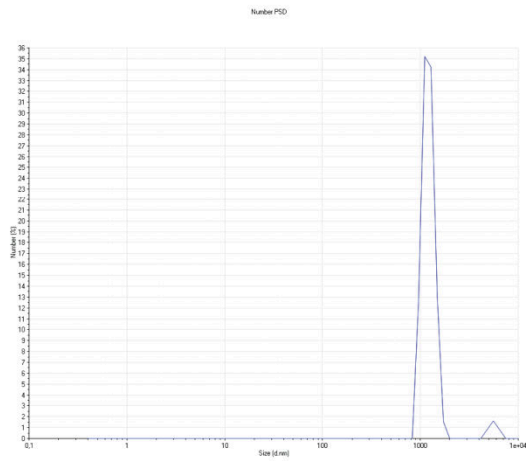

Count Rate: 427.3kpps  
**Cumulative result**  
Z-average size: 9554 d.nm  
PDI: 0.303  
PDI width: 3336 d.nm  
**Distribution result**  
Peak 1: Mean / Area  
1210 d.nm / 98.95%  
Peak 2: 9206 d.nm / 1.05%

# NP-ImS18

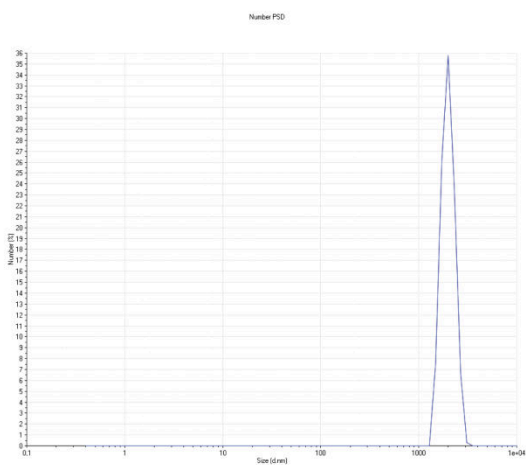

Count Rate: 130.9kpps  
**Cumulative result**  
Z-average size: 2719 d.nm  
PDI: 0.271  
PDI width: 1675 d.nm  
**Distribution result**  
Peak 1: Mean / Area  
2083 d.nm / 100.0%

S13. Number of particle size distribution of NP-ImSn (n=4, 10 and 18) at 10gL<sup>-1</sup> concentration.

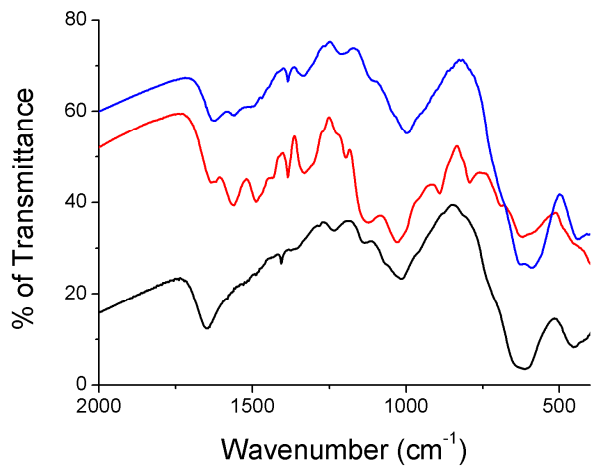

S14. Infrared of silanized magnetic nanoparticles. NP-ImS4 (black line); NP-ImS10 (red line) and NP-ImS18 (blue line).

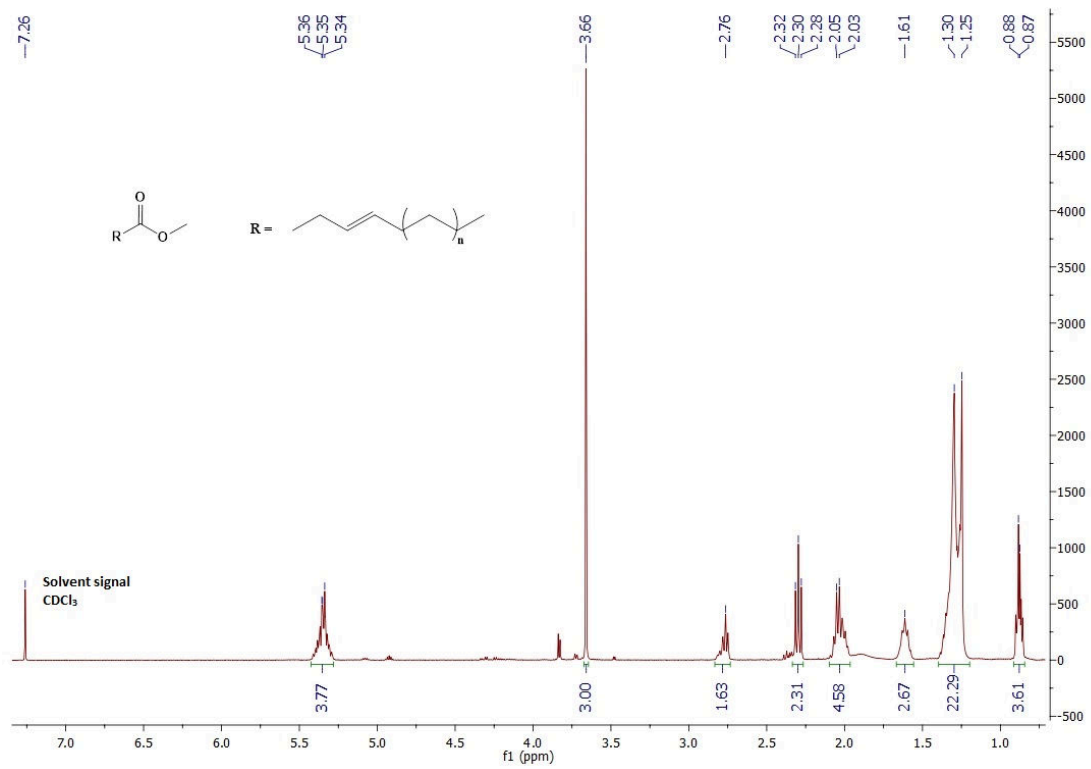

S15. <sup>1</sup>H NMR spectra of methylated fatty acids.

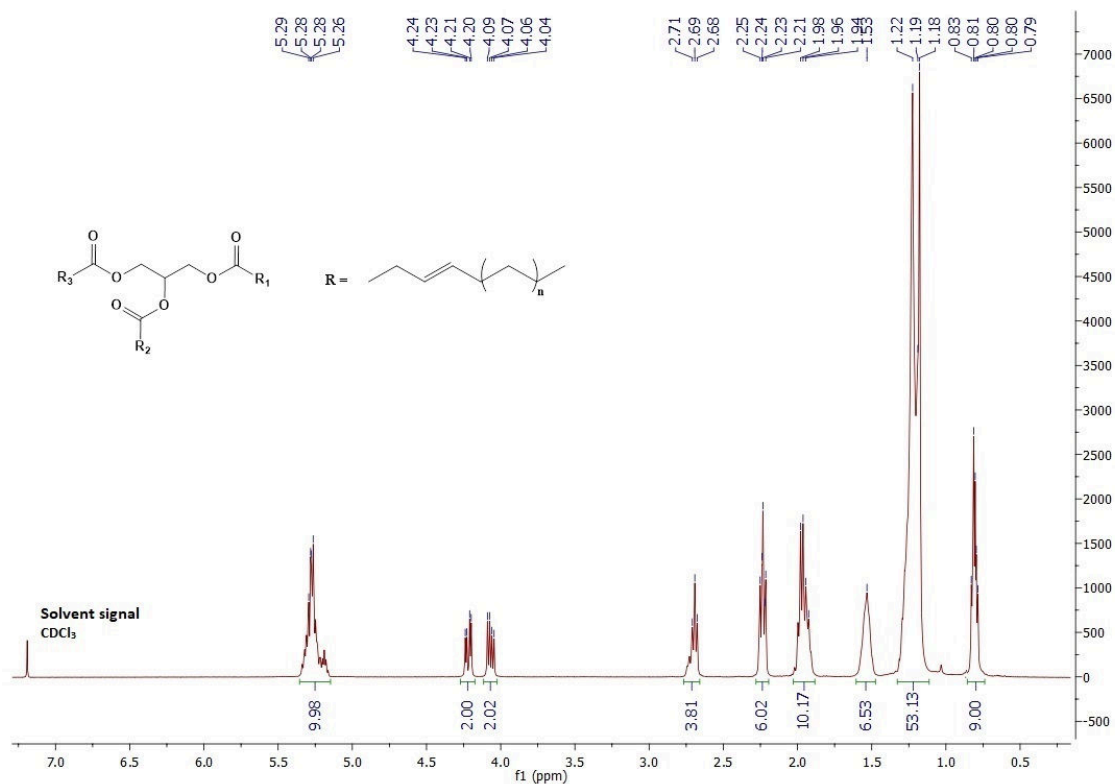

S16.  $^1\text{H}$  NMR spectra of oleyltriacylglyceride.

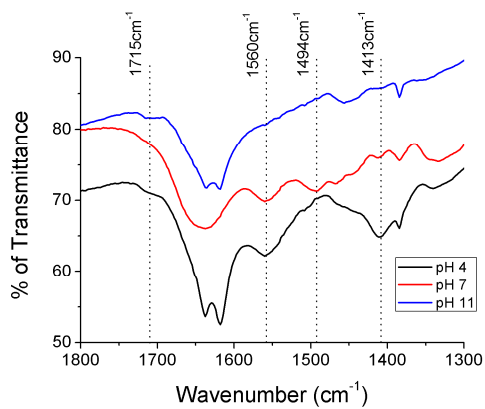

S17. FTIR spectra of immobilized CAL-B on NP-ImS18 at pHs 4 (black line), 7 (red line) and 11 (blue line).

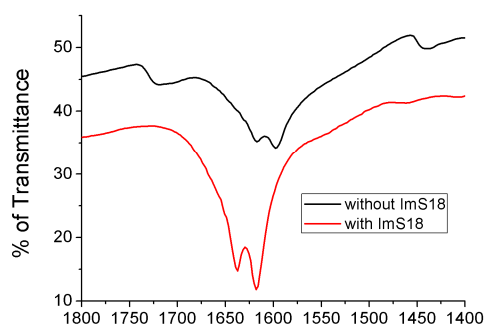

S18. FTIR spectra of immobilized CAL-B on NP-ImS4 in a system without ImS18 as a contaminant (black line) and with ImS18 as a contaminant (red line) .
